# Supplementary material for: Effect of Modified Triple-Layer Application on the Bond Strength of Different Dental Adhesive Systems to Dentin
Source: MDPI journal article supplement (doi:10.3390/jfb14100522), 2023-10-17
Supplement: s1 [file s1]

**Table S1.** Micro-tensile bond strength test groups.

| Group  | Adhesive System | Application Technique | Teeth<br>( <i>n</i> ) | Slabs/24h | Slabs/6<br>months |
|--------|-----------------|-----------------------|-----------------------|-----------|-------------------|
| 1      | CSE             | A                     | 5                     | 30        | 30                |
| 2      | CSE             | APP                   | 5                     | 30        | 30                |
| 3      | CSE             | AAP                   | 5                     | 30        | 30                |
| 4      | CSE             | AAA                   | 5                     | 30        | 30                |
| 5      | OBFL            | A                     | 5                     | 30        | 30                |
| 6      | OBFL            | APP                   | 5                     | 30        | 30                |
| 7      | OBFL            | AAP                   | 5                     | 30        | 30                |
| 8      | OBFL            | AAA                   | 5                     | 30        | 30                |
| 9      | OBU             | A                     | 5                     | 30        | 30                |
| 10     | OBU             | APP                   | 5                     | 30        | 30                |
| 11     | OBU             | AAP                   | 5                     | 30        | 30                |
| 12     | OBU             | AAA                   | 5                     | 30        | 30                |
| 13     | PBU             | A                     | 5                     | 30        | 30                |
| 14     | PBU             | APP                   | 5                     | 30        | 30                |
| 15     | PBU             | AAP                   | 5                     | 30        | 30                |
| 16     | PBU             | AAA                   | 5                     | 30        | 30                |
| Total: |                 |                       | 80                    | 480       | 480               |

Clearfil SE Bond (CSE); OptiBond FL (OBFL); OptiBond Universal (OBU); Prime&Bond Universal (PBU); Single active application (A); triple application, Active–Passive–Passive (APP); triple application, Active–Active–Passive (AAP); triple application, Active–Active–Active (AAA).
